# Supplementary material
Source: HighWire-hosted journal article supplement (https://mentalhealth.bmj.com/content/27/1/e301184)
Supplement: inline-supplementary-material-2 [file inline-supplementary-material-2.pdf]

**Table S1: Studies reporting on spontaneous movement disorders (SMDs)**

| Study                                 | Country      | Sample, n (M/F) | Diagnosis (%)                            | Age, yr mean | FEP | DUP mean/median (years) | Scale and threshold    | Dyskinesia (%) <sup>a</sup> | Parkinsonism (%) <sup>a</sup> | Akathisia (%) <sup>a</sup> | Dystonia (%) <sup>a</sup> | Risk of bias |
|---------------------------------------|--------------|-----------------|------------------------------------------|--------------|-----|-------------------------|------------------------|-----------------------------|-------------------------------|----------------------------|---------------------------|--------------|
| Aydemir et al, 2005 (36)              | Turkey       | 22 (9/13)       | SCZ                                      | 29.2         | -   | 3.77                    | AIMS (S&K)             | 23                          | -                             | -                          | -                         | moderate     |
| Ayehu et al, 2014 (37)                | Ethiopia     | 64 (43/21)      | SCZ 73%, SZD 8%, SAD 19%                 | 34.7         | -   | 2                       | AIMS (S&K), SAS ≥3     | 5                           | 9                             | -                          | -                         | moderate     |
| Bhandari et al, 2017 (38)             | India        | 100 (52/48)     | SCZ                                      | 30.7         | +   | unknown                 | AIMS (S&K)             | 14                          | -                             | -                          | -                         | moderate     |
| Caligiuri et al, 1994 (39)            | USA          | 21 (21/0)       | SCZ                                      | 37.1         | -   | 6                       | AIMS ≥1                | 14                          | -                             | -                          | -                         | high         |
| Caligiuri et al, 1997 (40)            | USA          | 35 (29/6)       | SCZ 86%, BD 9%, OPD 5%                   | 45.6         | -   | 5.6                     | SAS                    | -                           | 37                            | -                          | -                         | high         |
| Carbon et al, 2015 (41)               | USA          | 33              | SCZ                                      | 13.6         | +   | unknown                 | AIMS (S&K)             | 0                           | 6                             | -                          | -                         | moderate     |
| Chatterjee et al, 1995 (42)           | USA          | 89 (47/42)      | SCZ 68%, SAD 32%                         | 26.2         | +   | 5.4                     | SAS ≥1 TDS (S&K)       | 1                           | 17                            | -                          | -                         | moderate     |
| Chong et al, 2005 (43)                | Singapore    | 174 (90/84)     | SCZ 43%, SZD 24%, SAD 5%, BD 3%, OPD 25% | 28.1         | +   | 1.4                     | SAS ≥3                 | -                           | 2.3                           | -                          | -                         | high         |
| Cortese et al, 2005 (44)              | Canada       | 39 (32/4)       | SCZ                                      | 23.6         | +   | unknown                 | SAS ≥3<br>ESRS-D ≥1    | 13                          | 18                            | -                          | -                         | high         |
| Cuesta et al, 2014 (45)               | Spain        | 77 (53/24)      | SCZ 43%, SZD 16%, SAD 7%, OPD 34%        | 30.1         | +   | 0.89                    | SAS ≥4<br>BARS<br>AIMS | -                           | 19.5                          | -                          | -                         | moderate     |
| Owens et al, 1982 (46)                | UK           | 47 (40/7)       | SCZ                                      | 66.7         | -   | 26.5                    | AIMS                   | 36                          | -                             | -                          | -                         | high         |
| Gervin et al, 1998 (47)               | Ireland      | 49              | SCZ/SZD                                  | 27.7         | +   | unknown                 | AIMS (S&K)             | 10                          | -                             | -                          | -                         | moderate     |
| Honer et al, 2005 (48)                | Multi-centre | 167 (128/39)    | SCZ/SZD/SAD                              | 16-45        | +   | 0.6                     | ESRS ≥2                | 4                           | 27                            | 6                          | -                         | moderate     |
| Honer et al, 2011a (49) HK cohort     | Hong Kong    | 84 (41/43)      | SCZ 54%, SZD 19%, OPD 27%                | 13-65        | +   | 0.5                     | AIMS ≥1<br>SAS ≥1      | 1.2                         | 11.9                          | -                          | -                         | high         |
| Honer et al, 2011b (49) Canada cohort | Canada       | 40 (31/9)       | SCZ 93%, SAD 5%, SZD 2%                  | 13-65        | +   | 0.7                     | AIMS ≥1<br>ESRS ≥2     | 10                          | 35                            | -                          | 15                        | high         |
| Fenn et al, 1996 (50)                 | Morocco      | 22 (19/3)       | SCZ                                      | 28           | -   | 4.2                     | AIMS (S&K)<br>SHRS >10 | 14                          | 18                            | -                          | -                         | moderate     |

|                             |                          |               |                                   |       |   |         |                                             |    |      |    |      |          |
|-----------------------------|--------------------------|---------------|-----------------------------------|-------|---|---------|---------------------------------------------|----|------|----|------|----------|
| Jager, 2000 (51)            | Australia                | 18 (12/6)     | SCZ 67%, SZD 11%, BD 6%, OPD 16%  | 23.4  | + | 1.7     | AIMS (S&K)<br>SAS $\geq 3$<br>BARS $\geq 2$ | 11 | 5.6  | 6  | -    | moderate |
| Kopala et al, 1998 (52)     | Canada                   | 41 (33/8)     | SCZ/SZD                           | 25.4  | + | 4.1     | ESRS                                        | 0  | 28   |    | 15.6 | moderate |
| Kopala et al, 2006 (53)     | Canada                   | 13 (11/2)     | SCZ 92%, SZD 8%                   | 22.3  | + | unknown | ESRS $\geq 2$                               | 8  | 8    | 8  | 0    | moderate |
| Lee et al, 2008 (54)        | Singapore                | 908 (470/438) | SCZ 49%, SZD 24%, SAD 5%, OPD 22% | 28.4  | + | 1.5     | AIMS (S&K)                                  | 0  | -    | -  | -    | high     |
| Mccreadie et al, 1994 (55)  | India                    | 12            | SCZ                               | 42    | - | 12      | AIMS (S&K)                                  | 0  | -    | -  | -    | moderate |
| Mccreadie et al, 2005 (56)  | Nigeria                  | 143 (71/72)   | SCZ                               | 46.9  | - | 10.7    | AIMS (S&K)<br>SAS $\geq 3$                  | 35 | 15   | -  | -    | high     |
| Ojagbemi et al, 2018 (57)   | Nigeria/<br>South Africa | 99 (58/41)    | SCZ/SZD                           | 16-45 | + | 2.5     | ESRS $\geq 2$                               | 3  | 18.2 | 3  | 0    | moderate |
| Ojagbemi et al, 2021 (58)   | Nigeria/<br>South Africa | 88 (47/41)    | SCZ/SZD                           | 16-45 | + | 2.5     | ESRS $\geq 2$                               | 3  | 16   | 3  | 0    | moderate |
| Peralta et al, 2010 (59)    | Spain                    | 200 (133/67)  | SCZ 47%, SZD 18%, OPD 35%         | 29.8  | - | unknown | MRS                                         | -  | 18.5 | 7  | -    | moderate |
| Peralta et al, 2014 (60)    | Spain                    | 102 (69/33)   | SCZ                               | 29.1  | - | 3.8     | AIMS (S&K)<br>SAS $\geq 3$<br>BARS $\geq 2$ | 16 | 24.5 | 4  | -    | moderate |
| Puri et al 1999 (61)        | UK                       | 27 (18/9)     | SCZ/SZD                           | 27.2  | + | 1.9     | AIMS (S&K)<br>SAS $\geq 3$<br>BARS $\geq 2$ | 11 | 4    | 0  | -    | high     |
| Rybakowski et al, 2014 (62) | Multi-centre             | 161           | SCZ 53%, SZD 40%, SAD 7%          | 26    | + | -       | SHRS $\geq 1$                               | 0  | 8    | 23 | -    | moderate |

M, male; F, female; FEP, first-episode psychosis; DUP, duration of untreated psychosis; SCZ, Schizophrenia; SZD, Schizophreniform disorder; SAD, Schizoaffective disorder; BD, bipolar disorder; OPD, other psychotic disorders; HK, Hong Kong; ESRS, Extrapyramidal Symptom Rating Scale (63); SAS, Simpson-Angus Scale for extrapyramidal side effects (64); BARS, Barnes Akathisia Rating Scale (65); AIMS, Abnormal Involuntary Movement Scale (66); S&K, Schooler & Kane severity criteria for definite tardive dyskinesia: a score of 2 on at least two items or a score of  $\geq 3$  on one item of the AIMS; SHRS, St. Hans Rating Scale for Extrapyramidal Symptoms (67); MRS, Modified Rogers Scale (68)

<sup>a</sup> Number and percentage of patients positive for the specific movement disorder in each study, according to the threshold in that study.
